# Supplementary material
Source: HighWire-hosted journal article supplement (https://bmjopen.bmj.com/content/10/6/e034943)
Supplement: inline-supplementary-material-1 [file inline-supplementary-material-1.pdf]

### Psychometric properties of an Arabic-language health literacy assessment scale for adolescents (HAS-A-AR) in Palestine

| <b>Supplement 1: Inter-item correlations of the factors retained</b> |                |            |            |            |            |            |            |
|----------------------------------------------------------------------|----------------|------------|------------|------------|------------|------------|------------|
| <b>Factor 1 Spearman Correlations</b>                                |                |            |            |            |            |            |            |
|                                                                      |                | <b>1.1</b> | <b>1.2</b> | <b>1.3</b> | <b>1.4</b> | <b>1.5</b> |            |
| 1.1                                                                  | Spearman's rho | —          |            |            |            |            |            |
|                                                                      | p-value        | —          |            |            |            |            |            |
|                                                                      | Upper 95% CI   | —          |            |            |            |            |            |
|                                                                      | Lower 95% CI   | —          |            |            |            |            |            |
| 1.2                                                                  | Spearman's rho | 0.569      | —          |            |            |            |            |
|                                                                      | p-value        | < .001     | —          |            |            |            |            |
|                                                                      | Upper 95% CI   | 0.606      | —          |            |            |            |            |
|                                                                      | Lower 95% CI   | 0.530      | —          |            |            |            |            |
| 1.3                                                                  | Spearman's rho | 0.468      | 0.574      | —          |            |            |            |
|                                                                      | p-value        | < .001     | < .001     | —          |            |            |            |
|                                                                      | Upper 95% CI   | 0.511      | 0.611      | —          |            |            |            |
|                                                                      | Lower 95% CI   | 0.422      | 0.535      | —          |            |            |            |
| 1.4                                                                  | Spearman's rho | 0.421      | 0.524      | 0.570      | —          |            |            |
|                                                                      | p-value        | < .001     | < .001     | < .001     | —          |            |            |
|                                                                      | Upper 95% CI   | 0.466      | 0.564      | 0.607      | —          |            |            |
|                                                                      | Lower 95% CI   | 0.373      | 0.481      | 0.530      | —          |            |            |
| 1.5                                                                  | Spearman's rho | 0.452      | 0.538      | 0.527      | 0.620      | —          |            |
|                                                                      | p-value        | < .001     | < .001     | < .001     | < .001     | —          |            |
|                                                                      | Upper 95% CI   | 0.496      | 0.577      | 0.567      | 0.654      | —          |            |
|                                                                      | Lower 95% CI   | 0.406      | 0.496      | 0.485      | 0.584      | —          |            |
| <b>Factor 2 Spearman Correlations</b>                                |                |            |            |            |            |            |            |
|                                                                      |                | <b>3.1</b> | <b>3.2</b> | <b>3.3</b> | <b>3.4</b> | <b>3.5</b> | <b>3.6</b> |
| 3.1                                                                  | Spearman's rho | —          |            |            |            |            |            |
|                                                                      | p-value        | —          |            |            |            |            |            |
|                                                                      | Upper 95% CI   | —          |            |            |            |            |            |
|                                                                      | Lower 95% CI   | —          |            |            |            |            |            |
| 3.2                                                                  | Spearman's rho | 0.347      | —          |            |            |            |            |
|                                                                      | p-value        | < .001     | —          |            |            |            |            |
|                                                                      | Upper 95% CI   | 0.395      | —          |            |            |            |            |
|                                                                      | Lower 95% CI   | 0.296      | —          |            |            |            |            |
| 3.3                                                                  | Spearman's rho | 0.381      | 0.354      | —          |            |            |            |
|                                                                      | p-value        | < .001     | < .001     | —          |            |            |            |
|                                                                      | Upper 95% CI   | 0.428      | 0.403      | —          |            |            |            |

|                                       |                |            |            |            |            |        |   |
|---------------------------------------|----------------|------------|------------|------------|------------|--------|---|
|                                       | Lower 95% CI   | 0.331      | 0.304      | —          |            |        |   |
| 3.4                                   | Spearman's rho | 0.373      | 0.357      | 0.480      | —          |        |   |
|                                       | p-value        | < .001     | < .001     | < .001     | —          |        |   |
|                                       | Upper 95% CI   | 0.420      | 0.405      | 0.522      | —          |        |   |
|                                       | Lower 95% CI   | 0.323      | 0.306      | 0.435      | —          |        |   |
| 3.5                                   | Spearman's rho | 0.284      | 0.267      | 0.303      | 0.332      | —      |   |
|                                       | p-value        | < .001     | < .001     | < .001     | < .001     | —      |   |
|                                       | Upper 95% CI   | 0.335      | 0.319      | 0.354      | 0.382      | —      |   |
|                                       | Lower 95% CI   | 0.231      | 0.213      | 0.251      | 0.281      | —      |   |
| 3.6                                   | Spearman's rho | 0.375      | 0.326      | 0.328      | 0.391      | 0.430  | — |
|                                       | p-value        | < .001     | < .001     | < .001     | < .001     | < .001 | — |
|                                       | Upper 95% CI   | 0.423      | 0.375      | 0.378      | 0.438      | 0.475  | — |
|                                       | Lower 95% CI   | 0.325      | 0.274      | 0.277      | 0.342      | 0.383  | — |
| <b>Factor 3 Spearman Correlations</b> |                |            |            |            |            |        |   |
|                                       |                | <b>2.1</b> | <b>2.2</b> | <b>2.3</b> | <b>2.4</b> |        |   |
| 2.1                                   | Spearman's rho | —          |            |            |            |        |   |
|                                       | p-value        | —          |            |            |            |        |   |
|                                       | Upper 95% CI   | —          |            |            |            |        |   |
|                                       | Lower 95% CI   | —          |            |            |            |        |   |
| 2.2                                   | Spearman's rho | 0.389      | —          |            |            |        |   |
|                                       | p-value        | < .001     | —          |            |            |        |   |
|                                       | Upper 95% CI   | 0.436      | —          |            |            |        |   |
|                                       | Lower 95% CI   | 0.340      | —          |            |            |        |   |
| 2.3                                   | Spearman's rho | 0.413      | 0.545      | —          |            |        |   |
|                                       | p-value        | < .001     | < .001     | —          |            |        |   |
|                                       | Upper 95% CI   | 0.458      | 0.584      | —          |            |        |   |
|                                       | Lower 95% CI   | 0.364      | 0.504      | —          |            |        |   |
| 2.4                                   | Spearman's rho | 0.335      | 0.421      | 0.553      | —          |        |   |
|                                       | p-value        | < .001     | < .001     | < .001     | —          |        |   |
|                                       | Upper 95% CI   | 0.384      | 0.466      | 0.591      | —          |        |   |
|                                       | Lower 95% CI   | 0.283      | 0.373      | 0.513      | —          |        |   |
